# Supplementary material for: Synthesis and Characterization of TiO2-ZnO-MgO Mixed Oxide and Their Antibacterial Activity
Source: PubMed Central journal article supplement (PMC6427488; doi:10.3390/ma12050698), 2019-02-27
Supplement: materials-12-00698-s001.pdf [file materials-12-00698-s001.pdf]

## Supplementary Materials

# Synthesis and Characterization of TiO<sub>2</sub>-ZnO-MgO Mixed Oxide and Their Antibacterial Activity

## Running Title: Antibacterial Activity of Mixed Oxide Nanomaterials

Luis M. Anaya-Esparza <sup>1</sup>, Efigenia Montalvo-González <sup>1</sup>, Napoleón González-Silva <sup>2</sup>,  
María D. Méndez-Robles <sup>2</sup>, Rafael Romero-Toledo <sup>3</sup>, Elhadi M. Yahia <sup>4</sup> and  
Alejandro Pérez-Larios <sup>2,\*</sup>

<sup>1</sup> Laboratorio Integral de Investigación en Alimentos, Tecnológico Nacional de México-Instituto Tecnológico de Tepic. Av., Tecnológico 255, Lagos del Country, 63175 Tepic, Nayarit, México; l\_m\_ae@hotmail.com (L.M.A.-E.); efimontalvo@gmail.com (E.M.-G.)

<sup>2</sup> Universidad de Guadalajara, Centro Universitario de los Altos. División de Ciencias Agropecuarias e Ingenierías. Carretera a Yahualica Km. 7.5, 47600 Tepatitlán de Morelos, Jalisco, México; napoleon.gonzalez@cualtos.udg.mx (N.G.-S.); mdmendez@cualtos.udg.mx (M.D.M.-R.)

<sup>3</sup> Universidad de Guanajuato, División de Ciencias Naturales y Exactas, Campus Guanajuato, Noria Alta S/N, Noria Alta, 36050 Guanajuato, Guanajuato, México; Ing\_Romero2009@hotmail.com

<sup>4</sup> Facultad de Ciencias Naturales, Universidad Autónoma de Querétaro. Avenida de las Ciencias S/N, Juriquilla, Santiago de Querétaro, 76230 Querétaro, México; yahia@uaq.mx

\* Correspondence: alarios@cualtos.udg.mx

**Table S1.** Results of normal distribution tests, using Levene's and Shapiro-Wilk W tests (*p*-values) for variables studied.

| Parameter              | Variable                      | Levene's test<br>( <i>p</i> -value) | Shapiro-Wilk W test<br>( <i>p</i> -value) |
|------------------------|-------------------------------|-------------------------------------|-------------------------------------------|
| Color parameters       | Luminosity                    | 0.0008                              | 0.0057                                    |
|                        | <i>a</i>                      | 0.0992                              | 0.4816                                    |
|                        | <i>b</i>                      | 0.0874                              | 0.0194                                    |
|                        | Chrome                        | 0.1114                              | 0.0736                                    |
|                        | Hue                           | 0.1540                              | 0.2450                                    |
| Antimicrobial activity | <i>Listeria monocytogenes</i> | 0.4399                              | 0.0839                                    |
|                        | <i>Staphylococcus aureus</i>  | 0.2995                              | 0.1029                                    |
|                        | <i>Escherichia coli</i>       | 0.4541                              | 0.0003                                    |
|                        | <i>Salmonella paratyphi</i>   | 0.1908                              | 0.0010                                    |
